# Supplementary material for: Enhancing the thermoelectric performance of n-type Bi2Te2.7Se0.3 through the incorporation of Ag9AlSe6 inclusions
Source: Royal Society of Chemistry journal article supplement (doi:10.1039/d2qi01232d), 2022-01-01
Supplement: d2qi01232d1.pdf [file d2qi01232d1.pdf]

## Electronic Supplementary Information (ESI)

### Enhancing thermoelectric performance of N-type $\text{Bi}_2\text{Te}_{2.7}\text{Se}_{0.3}$ through incorporation of $\text{Ag}_9\text{AlSe}_6$ inclusions

Tao Chen<sup>a,b</sup>, Hongwei Ming<sup>a,b</sup>, Xiaoying Qin<sup>a,b\*</sup>, Chen Zhu<sup>a,b</sup>, Yong Chen<sup>a</sup>, Li Ai<sup>a,b</sup>, Di Li<sup>a,b</sup>, Yongsheng Zhang<sup>a,b</sup>, Hongxing Xin<sup>a</sup>, Jian Zhang<sup>a,b</sup>

a Key Lab of Photovoltaic and Energy Conservation Materials, Institute of Solid State Physics, HFIPS, Chinese Academy of Sciences, Hefei 230031, China.

b University of Science and Technology of China, Hefei 230026, China.230601, P. R. China.

\* Corresponding author:

E-mail address: xyqin@issp.ac.cn (X.Y. Qin)

## 1. The measured densities for all the bulk samples

**Table S1 The density( $d$ ) and the relative density( $d_r$ ) of BTS- $x$ vol%Ag<sub>9</sub>AlSe<sub>6</sub> ( $x=0, 0.15, 0.25, 0.35, 0.50$  and  $0.70$ ).**

**Table S1. The density( $d$ ) and the relative density( $d_r$ ) of Bi<sub>2</sub>Te<sub>2.7</sub>Se<sub>0.3</sub> - $x$ vol. % Ag<sub>9</sub>AlSe<sub>6</sub>**

| Bi <sub>2</sub> Te <sub>2.7</sub> Se <sub>0.3</sub> - $x$ vol. % Ag <sub>9</sub> AlSe <sub>6</sub> | $d$ (g cm <sup>3</sup> ) | $d_r$ (%) |
|----------------------------------------------------------------------------------------------------|--------------------------|-----------|
| $x=0$                                                                                              | 7.82                     | 98.9      |
| $x=0.15$                                                                                           | 7.78                     | 98.4      |
| $x=0.25$                                                                                           | 7.83                     | 99.0      |
| $x=0.35$                                                                                           | 7.76                     | 98.1      |
| $x=0.50$                                                                                           | 7.79                     | 98.5      |
| $x=0.70$                                                                                           | 7.69                     | 97.3      |

where  $d_r$  is relative density, defined as  $d_r=d/d_o$ , here  $d$  is the measured density and  $d_o$  (7.91 of g cm<sup>-3</sup>) is the theoretical density of Bi<sub>2</sub>Te<sub>2.7</sub>Se<sub>0.3</sub>. For composite specimens Bi<sub>2</sub>Te<sub>2.7</sub>Se<sub>0.3</sub> - $x$ vol. % Ag<sub>9</sub>AlSe<sub>6</sub>, the theoretical density is modified as:  $d_o=(1-x) d_1 + x d_2$ , where  $d_1=d_o$  for BTS matrix and  $d_2$  (7.14 g cm<sup>-3</sup>) is the theoretical density of Ag<sub>9</sub>AlSe<sub>6</sub>.

## 2. SEM image of the BTS

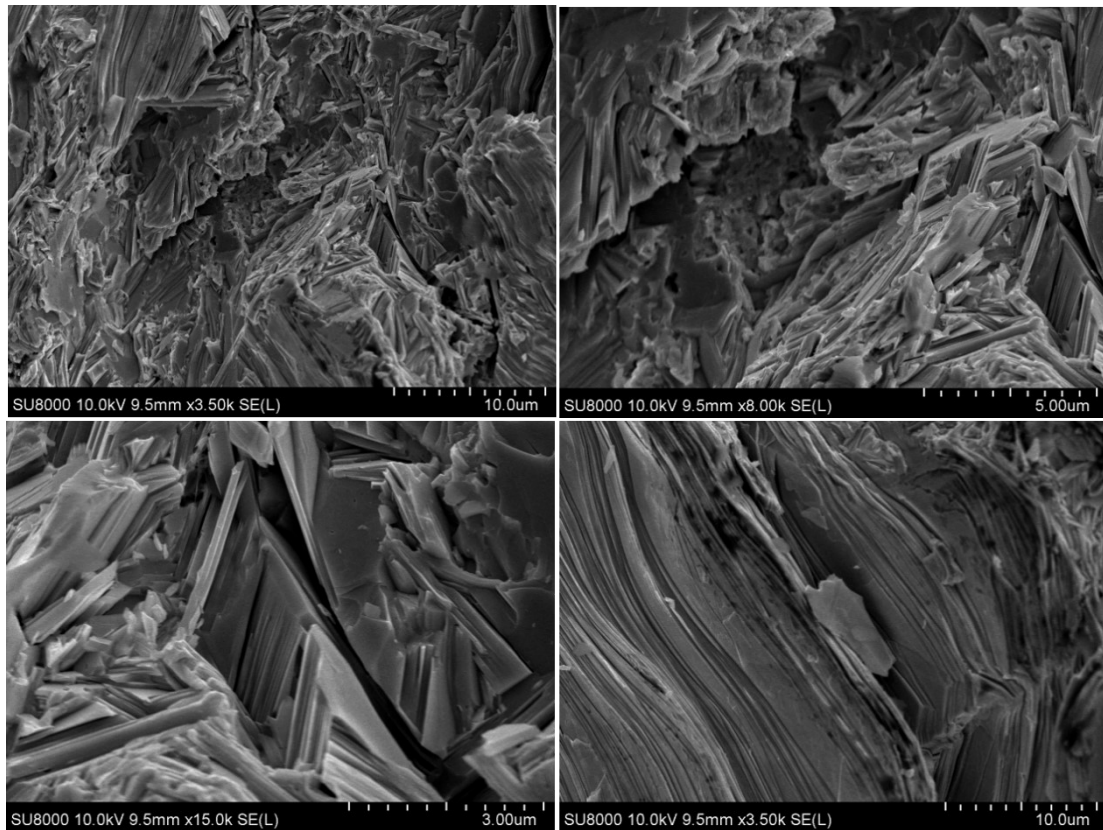

FIG.S1. SEM image of the fractured surface of the BTS.

## 3. SEM image of the $\text{Ag}_9\text{AlSe}_6$ particle

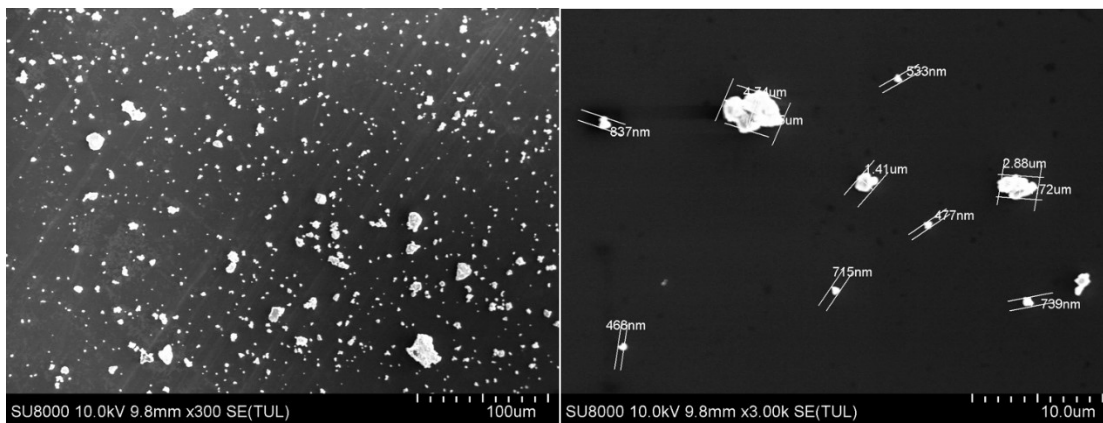

FIG.S2. SEM image of the  $\text{Ag}_9\text{AlSe}_6$  particle.

4. SEM and EDS images of fracture surfaces of the bulk sample BTS-0.35Vol%Ag<sub>9</sub>AlSe<sub>6</sub>

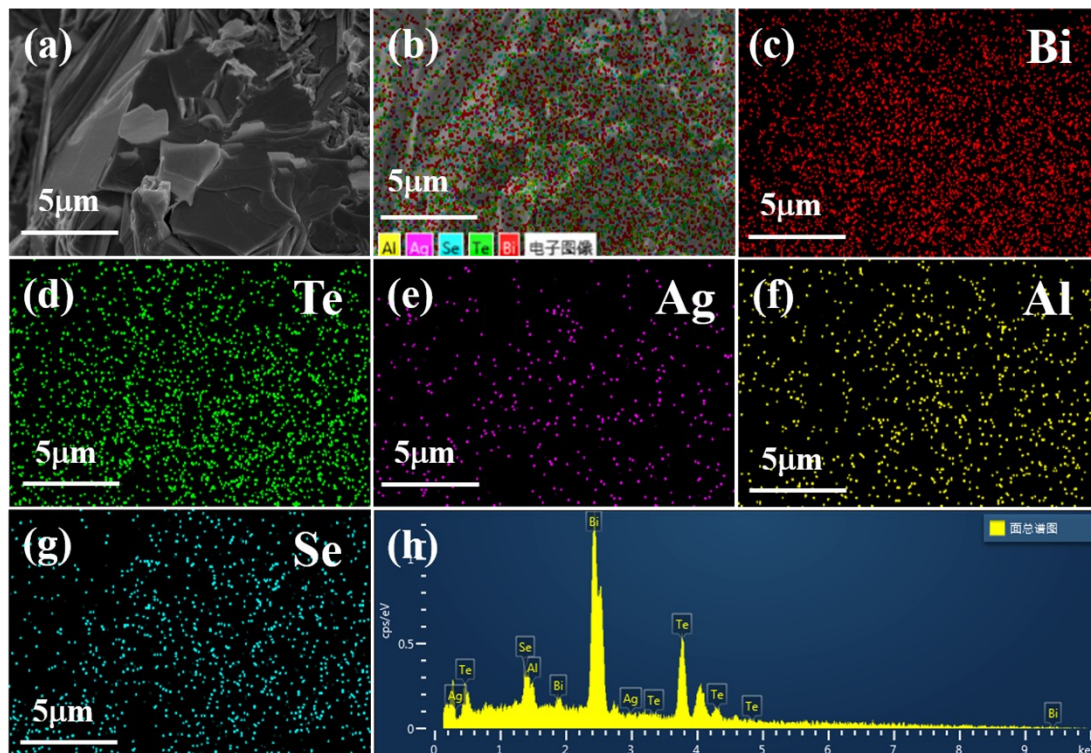

FIG. S3. SEM and EDS images of fracture surfaces of the bulk sample BTS-0.35Vol%Ag<sub>9</sub>AlSe<sub>6</sub>.

5. The dependence of absolute Seebeck coefficient  $S$  on carrier concentration (Pisarenko curve)

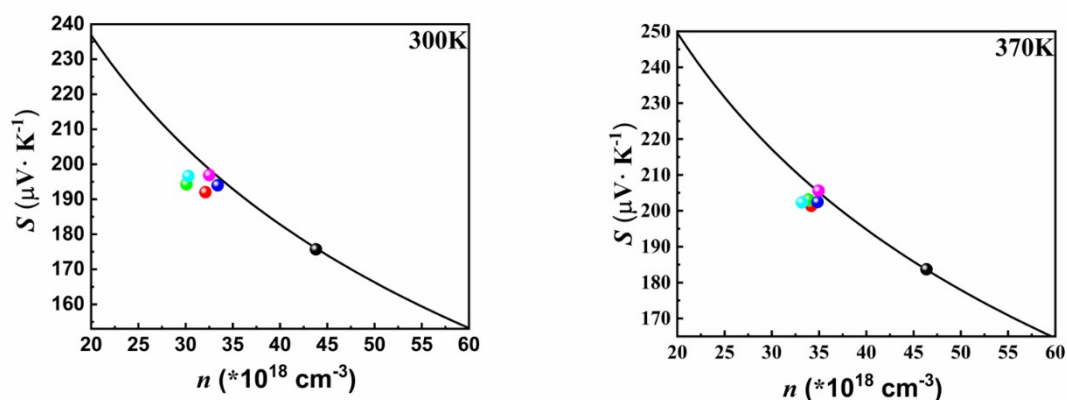

FIG.S4. The dependence of absolute Seebeck coefficient  $S$  on carrier concentration (Pisarenko curve) at 300 K and 370K for BTS- $x$ vol%Ag<sub>9</sub>AlSe<sub>6</sub> ( $x=0, 0.15, 0.25$ ),

0.35, 0.50 and 0.70).

6. The temperature dependence of thermal conductivity of electric component  $\kappa_E$

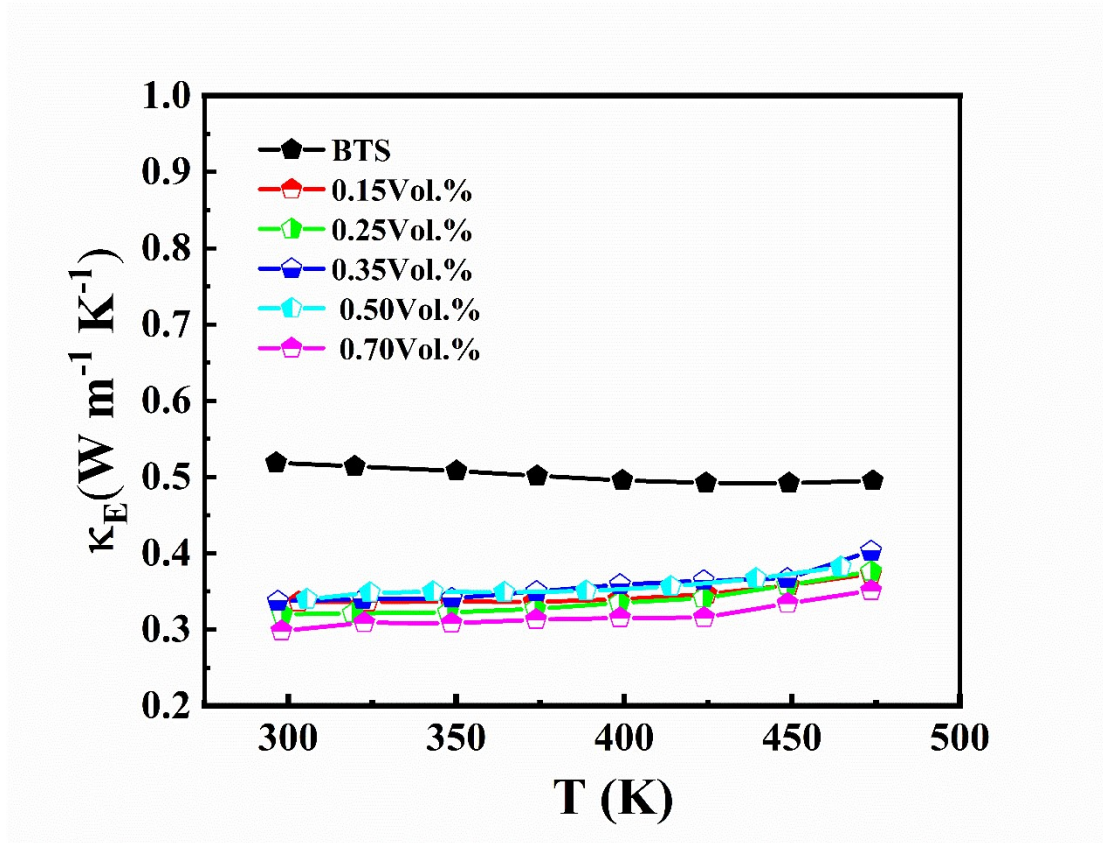

FIG.S5. The temperature dependence of thermal conductivity of electric component  $\kappa_E$  for  $\text{BTS-}x\text{vol}\% \text{Ag}_9\text{AlSe}_6$  ( $x=0, 0.15, 0.25, 0.35, 0.50$  and  $0.70$ ).

## 7. The thermal stability for BTS-0.35vol%Ag<sub>9</sub>AlSe<sub>6</sub> sample

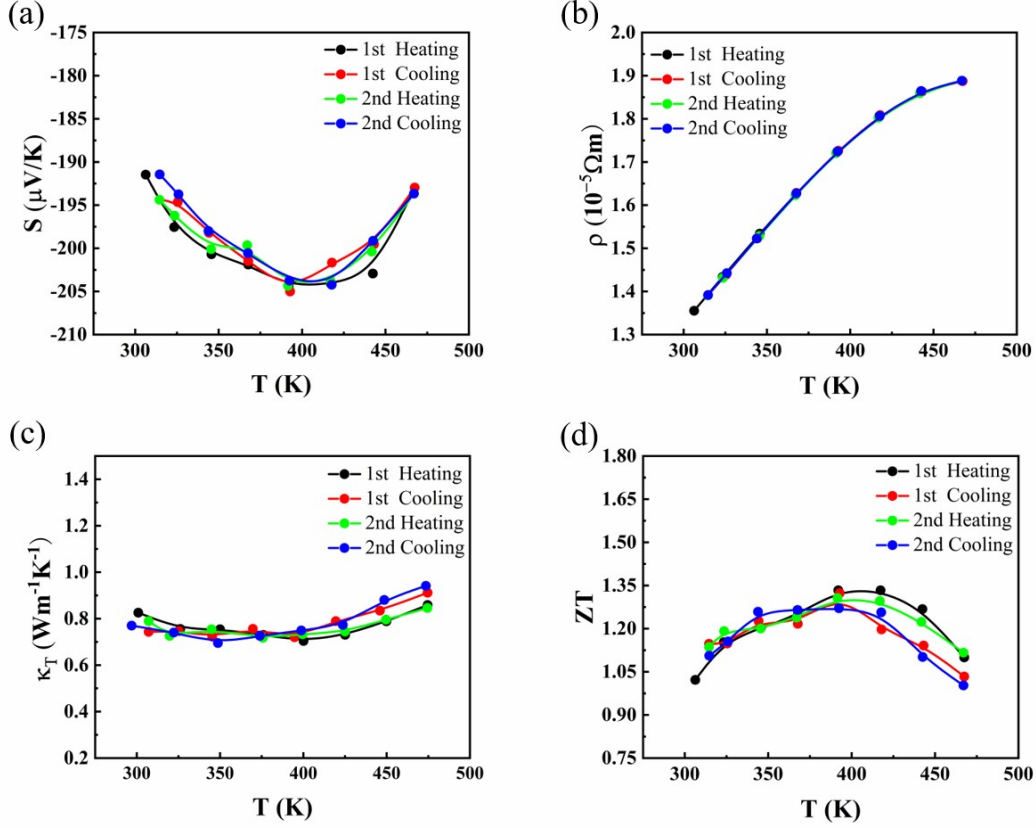

FIG.S6. The cyclic measurements for the BTS-0.35vol%Ag<sub>9</sub>AlSe<sub>6</sub> sample. Temperature-dependent (a) Seebeck coefficient, (b) electrical resistivity, (c) total thermal conductivity and (d) ZT, wherein the symbol 1st Heating and Cooling, 2nd Heating and Cooling stand for the first heating and cooling, second heating and cooling measurements.

## 8. Calculation of Lattice Thermal Conductivity

The lattice thermal conductivity  $\kappa_L$  can be calculated by using the Debye-Callaway model[1]:

$$\kappa_L = \frac{4\pi k_B^4 T^3}{v h^3} \int_0^{\theta_D/T} \tau_T \frac{z^4 \exp(-z)}{[\exp(z) - 1]^2} dz \quad (S1)$$

$$\tau_T^{-1} = \tau_U^{-1} + \tau_N^{-1} + \tau_{PD}^{-1} + \tau_E^{-1} + \tau_B^{-1} + \tau_{NP}^{-1} \quad (S2)$$

where  $\tau_U$ ,  $\tau_N$ ,  $\tau_{PD}$ ,  $\tau_E$ ,  $\tau_B$  and  $\tau_{NP}$  are relaxation time corresponding to the scattering from phonon-phonon U- and N-process (U+N), point defects (PD), electron-phonon (E), phase boundaries (B), and nanoparticles (NP), respectively. Here, this model is used to analysis the lattice thermal conductivity. To analyze the  $\kappa_L$  the expression of the

different scattering mechanisms can be rewritten as below:

$$\tau_U^{-1} = \frac{\hbar\gamma^2\omega^2T^{-\theta_D/3T}}{Mv^2\theta_D} \quad (S3)$$

$$\tau_N^{-1} = \beta\tau_U^{-1} = \beta\frac{\hbar\gamma^2\omega^2T^{-\theta_D/3T}}{Mv^2\theta_D} \quad (S4)$$

$$\tau_{PD}^{-1} = \frac{V\omega^4}{4\pi v^3}\Gamma \quad (S5)$$

$$\tau_E^{-1} = \frac{E_{def}^2 m^* \omega^2}{2\pi\hbar^3 \rho v} \quad (S6)$$

$$\tau_B^{-1} = v/l \quad (S7)$$

$$\tau_{NP}^{-1} = v \left[ (2\pi R)^2 + \left( \frac{4\pi R^2}{9} \left( \frac{\Delta_D}{D} \right)^2 \left( \frac{\omega R}{v} \right)^4 \right)^{-1} \right]^{-1} N_P \quad (S8)$$

$$A = \frac{V}{4\pi v^3}\Gamma \quad (S9)$$

$$B = (1 + \beta) \frac{\hbar\gamma^2}{Mv^2\theta_D} \quad (S10)$$

$$C = \frac{E_{def}^2 m^*}{2\pi\hbar^3 \rho v} \quad (S11)$$

$$\tau_T^{-1} = A\omega^4 + B\omega^2 T \exp\left(-\frac{\theta_D}{3T}\right) + C\omega^2 + v/l + v\sigma N_P \quad (S12)$$

Thus

To quantitatively calculate  $\kappa_L$ , the literature values [2] of Debye temperature  $\theta_D=164\text{K}$  and sound velocity  $v=1778\text{m s}^{-1}$  are used for BTS -  $x\text{vol}\%$   $\text{Ag}_9\text{AlSe}_6$  ( $x=0, 0.15, 0.25, 0.35, 0.50$  and  $0.70$ ).  $l$  is the average spatial distance between the  $\text{Ag}_9\text{AlSe}_6$  nanoparticles in the BTS,  $\Delta D/D = 0.022$  and the average radius of  $\text{Ag}_9\text{AlSe}_6$   $R = 628$  nm; the pre-factors of point defect A, U- and N- process B, electron-phonon scattering C and the number density of nanoparticles  $N_P$  were provided in Table S2.

**Table S2 Parameters for the calculation of lattice thermal conductivity by using the Debye-Callaway model**

| Sample | A( $10^{-42}\text{s}^3$ ) | B( $10^{-17}\text{sK}^{-1}$ ) | C( $10^{-16}\text{S}$ ) | $l(\text{nm})$ | $N_P(10^{13}\text{m}^{-3})$ |
|--------|---------------------------|-------------------------------|-------------------------|----------------|-----------------------------|
| 0      | 4.6                       | 3.9                           | 1.8                     | --             | --                          |
| 0.15   | 4.6                       | 3.9                           | 1.8                     | 533            | 4.54                        |
| 0.25   | 4.6                       | 3.9                           | 1.8                     | 477            | 4.81                        |
| 0.35   | 4.6                       | 3.9                           | 1.8                     | 404            | 6.34                        |

|             |            |            |            |            |             |
|-------------|------------|------------|------------|------------|-------------|
| <b>0.50</b> | <b>4.6</b> | <b>3.9</b> | <b>1.8</b> | <b>352</b> | <b>6.83</b> |
| <b>0.70</b> | <b>4.6</b> | <b>3.9</b> | <b>1.8</b> | <b>430</b> | <b>5.37</b> |

---

## Reference

- [1] J. Callaway, H.C. von Baeyer, *Physical Review*, 120 (1960) 1149-1154.
- [2] B. Jabar, X. Qin, D. Li, J. Zhang, A. Mansoor, H. Xin, C. Song, L. Huang, *Journal of Materials Chemistry A*, 7 (2019) 19120-19129.
